# Supplementary material
Source: Springer Nature journal article supplement (https://www.springermedizin.de/resource/supplementary/12885_2013_4714_MOESM6_ESM.pdf/9467112)
Supplement: MOESM6 [file 9467112]

**Additional File 6.**

**Title:** Information about miRNAs selected for validation.

**Description:** Information of the miRNAs selected for validation, including 3p or 5p form (3' or 5'), MIMAT ID, family and sequence of the mature miRNA. "\*" refers to the minor form of the miRNA, according to miRBase v.15 nomenclature.

**Additional File 6.** Information about miRNAs selected for validation.

| miRBase v.18 name  | miRBase ID   | family   | sequence                |
|--------------------|--------------|----------|-------------------------|
| hsa-miR-92b-3p     | MIMAT0003658 | mir-25   | UAUUGCACUCGUCCCGGCCUC   |
| hsa-miR-92b-5p(*)  | MIMAT0004792 | mir-25   | AGGGACGGGACGCGGUGCAGUG  |
| hsa-miR-132-3p     | MIMAT0000426 | mir-132  | UAACAGUCUACAGCCAUGGUCG  |
| hsa-miR-139-5p     | MIMAT0000250 | mir-139  | UCUACAGUGCACGUGUCUCCAGU |
| hsa-miR-149-5p     | MIMAT0000450 | mir-149  | UCUGGCUCCGUGUCUUCACUCCC |
| hsa-miR-149-3p(*)  | MIMAT0004609 | mir-149  | AGGGAGGGACGGGGGCUGUGC   |
| hsa-miR-433        | MIMAT0001627 | mir-433  | AUCAUGAUGGGCUCCUCGGUGU  |
| hsa-miR-409-3p     | MIMAT0001639 | mir-154  | GAAUGUUGCUCGGUGAACCCCU  |
| hsa-miR-379-5p     | MIMAT0000733 | mir-379  | UGGUAGACUAUGGAACGUAGG   |
| hsa-miR-1207-5p    | MIMAT0005871 | mir-1207 | UGGCAGGGAGGCUGGGAGGGG   |
| hsa-miR-1275       | MIMAT0005929 | mir-1275 | GUGGGGGAGAGGCUGUC       |
| hsa-miR-1228-5p(*) | MIMAT0005582 | mir-1228 | GUGGGCGGGGCAGGUGUGUG    |
| hsa-miR-3196       | MIMAT0015080 |          | CGGGGCGGCAGGGGCCUC      |
